# Supplementary material
Source: PubMed Central journal article supplement (PMC7575518)
Supplement: rspb20201326supp2.pdf [file rspb20201326supp2.pdf]

## Electronic Supplementary Information

Migration behaviour of commercial monarchs reared outdoors and wild-derived monarchs reared indoors

Ayşe Tenger-Trolander<sup>a,1</sup> and Marcus R. Kronforst<sup>a,1</sup>

<sup>a</sup> Department of Ecology and Evolution, University of Chicago, Chicago, IL 60637

<sup>1</sup> Correspondence may be addressed to [atengertrolander@uchicago.edu](mailto:atengertrolander@uchicago.edu) or [mkronforst@uchicago.edu](mailto:mkronforst@uchicago.edu)

**Article doi:** 10.1098/rspb.[paper ID in form xxxx.xxxx e.g. 10.1098/rspb.2016.0049].

### Supplemental Files

1. TengerTrolander\_Video\_S1.mp4 is a 1-minute clip of individual S101, a wild type reared in a glass top greenhouse in autumn changing directions repeatedly in a flight simulator.
2. TengerTrolander\_Video\_S2.mp4 is a 1-minute clip of individual E101, a wild type reared outdoors in autumn flying south consistently in a flight simulator.
3. TengerTrolander\_Data\_S1.xlsx contains orientation data for all monarchs, organized by population and rearing condition.

### Supplemental Tables

**Table S1.** Number of total flight trials and successful flight tests for all tested monarchs (N=74) by population of origin (wild type or commercial) and treatment (outdoor or indoor-reared). Greyed areas indicate individuals with successful flight tests and white those that never flew. Laboratory reared individual are S123, S124, S122, and S126.

| Wild type Outdoor |        |                    | Wild type Indoor |        |                    | Commercial Outdoor |        |                    |
|-------------------|--------|--------------------|------------------|--------|--------------------|--------------------|--------|--------------------|
| ID                | Trials | Successful flights | ID               | Trials | Successful flights | ID                 | Trials | Successful flights |
| E104              | 12     | 2                  | S101             | 8      | 6                  | B102               | 9      | 3                  |
| E108              | 11     | 4                  | S123             | 4      | 3                  | B103               | 9      | 2                  |
| E110              | 10     | 1                  | S113             | 3      | 3                  | B100               | 8      | 2                  |
| E101              | 9      | 7                  | S111             | 3      | 2                  | B108               | 8      | 1                  |
| E100              | 9      | 0                  | S115             | 3      | 1                  | B105               | 7      | 5                  |
| E107              | 9      | 0                  | S118             | 3      | 1                  | B142               | 7      | 5                  |
| E103              | 8      | 5                  | S104             | 3      | 0                  | B146               | 7      | 3                  |
| E111              | 8      | 2                  | S124             | 3      | 0                  | B144               | 7      | 2                  |
| E106              | 8      | 1                  | S117             | 2      | 2                  | B133               | 6      | 4                  |
| E105              | 8      | 0                  | S016             | 2      | 1                  | B139               | 6      | 0                  |
| E113              | 8      | 0                  | S110             | 2      | 1                  | B143               | 6      | 0                  |
| E109              | 7      | 2                  | S112             | 2      | 1                  | B111               | 5      | 3                  |
| E102              | 6      | 0                  | S119             | 2      | 1                  | B124               | 5      | 3                  |
| E112              | 4      | 0                  | S122             | 2      | 1                  | B134               | 5      | 1                  |
| E114              | 2      | 0                  | S107             | 2      | 0                  | B138               | 5      | 1                  |
|                   |        |                    | S108             | 2      | 0                  | B140               | 5      | 1                  |
|                   |        |                    | S109             | 2      | 0                  | B141               | 5      | 1                  |
|                   |        |                    | S105             | 1      | 1                  | B145               | 5      | 0                  |
|                   |        |                    | S114             | 1      | 1                  | B104               | 4      | 4                  |
|                   |        |                    | S126             | 1      | 1                  | B110               | 4      | 4                  |
|                   |        |                    | S103             | 1      | 0                  | B106               | 4      | 3                  |
|                   |        |                    | S116             | 1      | 0                  | B115               | 4      | 2                  |
|                   |        |                    |                  |        |                    | B117               | 4      | 2                  |
|                   |        |                    |                  |        |                    | B128               | 4      | 1                  |
|                   |        |                    |                  |        |                    | B132               | 4      | 1                  |
|                   |        |                    |                  |        |                    | B136               | 4      | 1                  |
|                   |        |                    |                  |        |                    | B109               | 3      | 3                  |
|                   |        |                    |                  |        |                    | B101               | 3      | 0                  |
|                   |        |                    |                  |        |                    | B130               | 3      | 0                  |
|                   |        |                    |                  |        |                    | B147               | 3      | 0                  |
|                   |        |                    |                  |        |                    | B126               | 2      | 1                  |
|                   |        |                    |                  |        |                    | B129               | 2      | 1                  |
|                   |        |                    |                  |        |                    | B127               | 2      | 0                  |
|                   |        |                    |                  |        |                    | B122               | 1      | 1                  |
|                   |        |                    |                  |        |                    | B125               | 1      | 0                  |
|                   |        |                    |                  |        |                    | B131               | 1      | 0                  |
|                   |        |                    |                  |        |                    | B137               | 1      | 0                  |

**Table S2.** Flight test data for all individuals from wild-type group reared indoors. Individual (ID), mean vector magnitude (R), mean vector (Direction Flown), minimum time in hours spent outdoors post tethering and rest period (Time outdoors), age in days, and the date of the flight test (Flight date). Data is organized by increasing amount of time spent outdoors. Data are color coded by their direction flown, S stands for south and N for north.

| ID   | R    | Direction Flown | Time outdoors (hrs) | Age (days) | Flight Date |
|------|------|-----------------|---------------------|------------|-------------|
| S111 | 0.83 | 191.11 S        | 1.03                | 11         | 10/27/2019  |
| S115 | 0.96 | 15.61 N         | 1.08                | 10         | 10/27/2019  |
| S113 | 0.99 | 161.2 S         | 1.37                | 10         | 10/27/2019  |
| S114 | 1    | 210.5 S         | 1.38                | 10         | 10/27/2019  |
| S110 | 0.98 | 77.06 N         | 1.67                | 11         | 10/27/2019  |
| S117 | 0.74 | 193.86 S        | 1.82                | 10         | 10/27/2019  |
| S105 | 0.64 | 212.53 S        | 2.07                | 12         | 10/27/2019  |
| S123 | 0.67 | 245.92 S        | 2.37                | 12         | 10/27/2019  |
| S101 | 0.42 | 123.5 S         | 3.95                | 13         | 10/7/2019   |
| S123 | 0.99 | 237.85 S        | 5.28                | 13         | 10/28/2019  |
| S111 | 0.4  | 194.32 S        | 6.82                | 19         | 11/4/2019   |
| S113 | 0.88 | 325.12 N        | 6.98                | 18         | 11/4/2019   |
| S117 | 0.91 | 50.12 N         | 7.1                 | 18         | 11/4/2019   |
| S118 | 0.22 | 115.32 S        | 7.3                 | 17         | 11/4/2019   |
| S123 | 0.99 | 293.7 N         | 7.33                | 20         | 11/4/2019   |
| S112 | 0.93 | 230.58 S        | 7.53                | 18         | 11/4/2019   |
| S106 | 0.5  | 54.2 N          | 7.68                | 20         | 11/4/2019   |
| S126 | 0.46 | 30.18 N         | 7.87                | 7          | 11/4/2019   |
| S119 | 0.96 | 221.65 S        | 7.95                | 17         | 11/4/2019   |
| S122 | 0.99 | 330.5 N         | 8.7                 | 20         | 11/4/2019   |
| S113 | 1    | 334.61 N        | 10                  | 20         | 11/6/2019   |
| S101 | 1    | 16.47 N         | 11.53               | 15         | 10/9/2019   |
| S101 | 0.77 | 326.5 N         | 14.7                | 20         | 10/14/2019  |
| S101 | 0.14 | 171.01 S        | 21.52               | 33         | 10/27/2019  |
| S101 | 0.55 | 128.5 S         | 22.98               | 34         | 10/28/2019  |
| S101 | 0.57 | 231.01 S        | 26.13               | 41         | 11/4/2019   |
